# Supplementary material for: Mapping of the Human Placenta: Experimental Evidence of Amniotic Epithelial Cell Heterogeneity
Source: PubMed Central journal article supplement — Cell Transplant. 2018 Mar 22;27(1):12–22. doi: 10.1177/0963689717725078 (PMC6434477; doi:10.1177/0963689717725078), 2018-03-22

**Central****Intermediate****Peripheral****Reflected****OCT-4**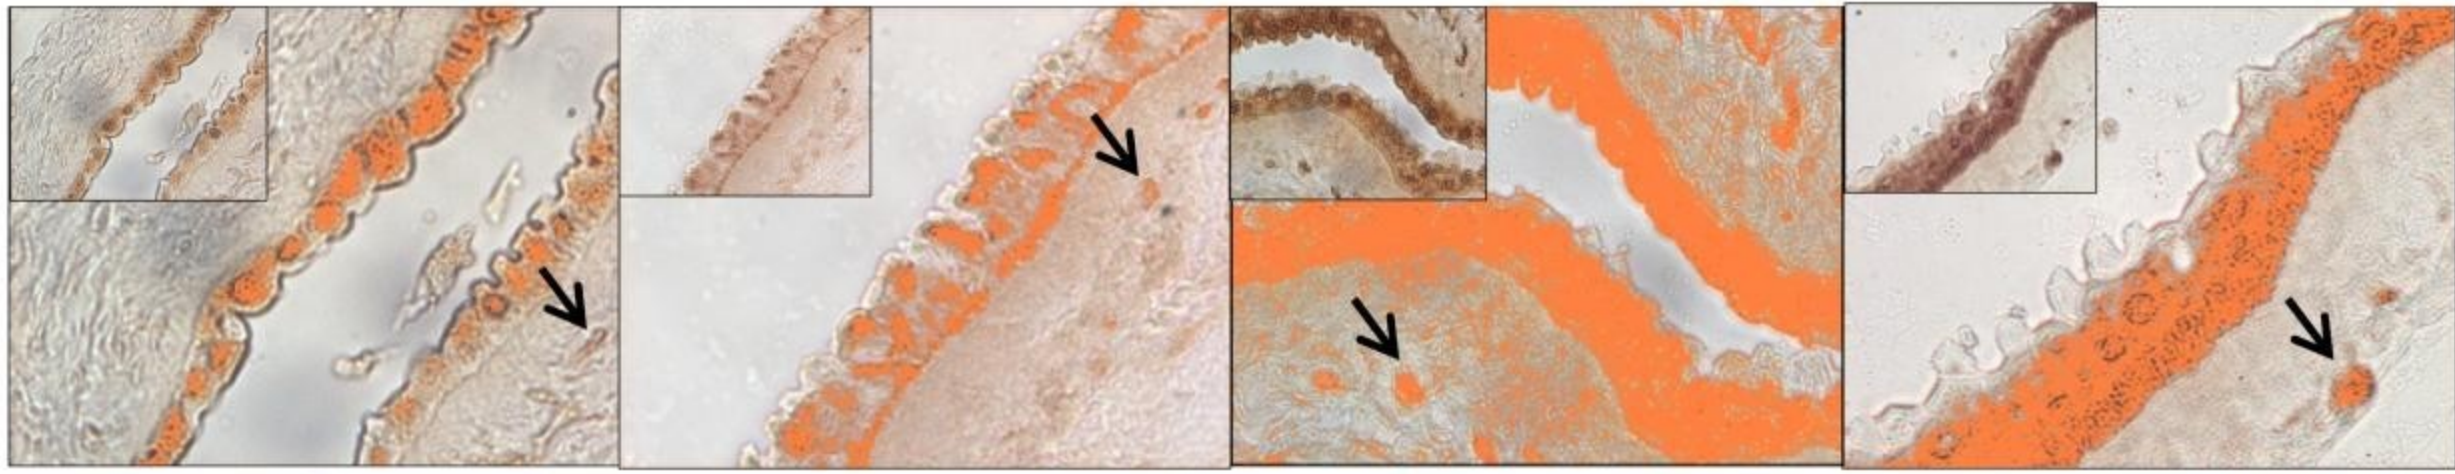**c-KIT**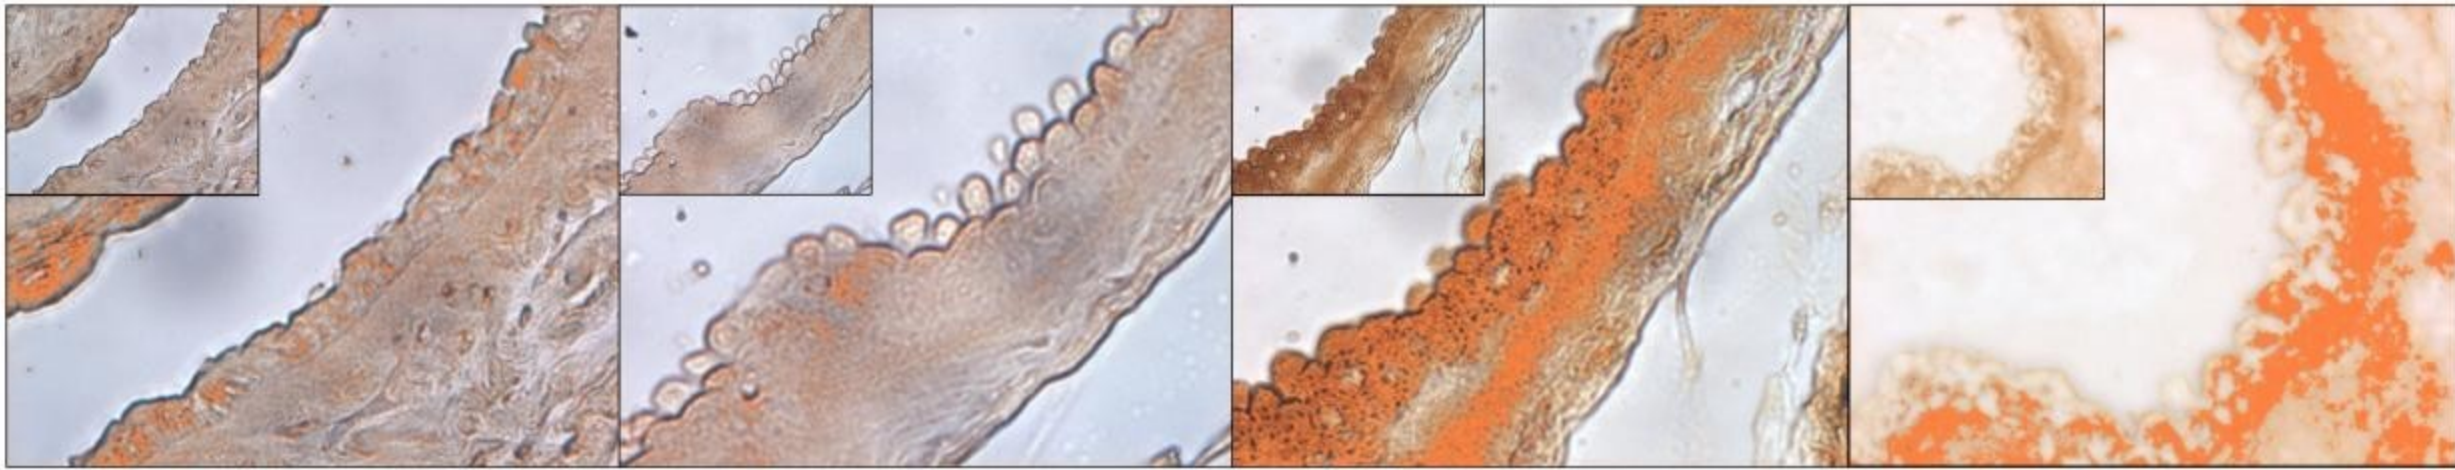**SOX-2**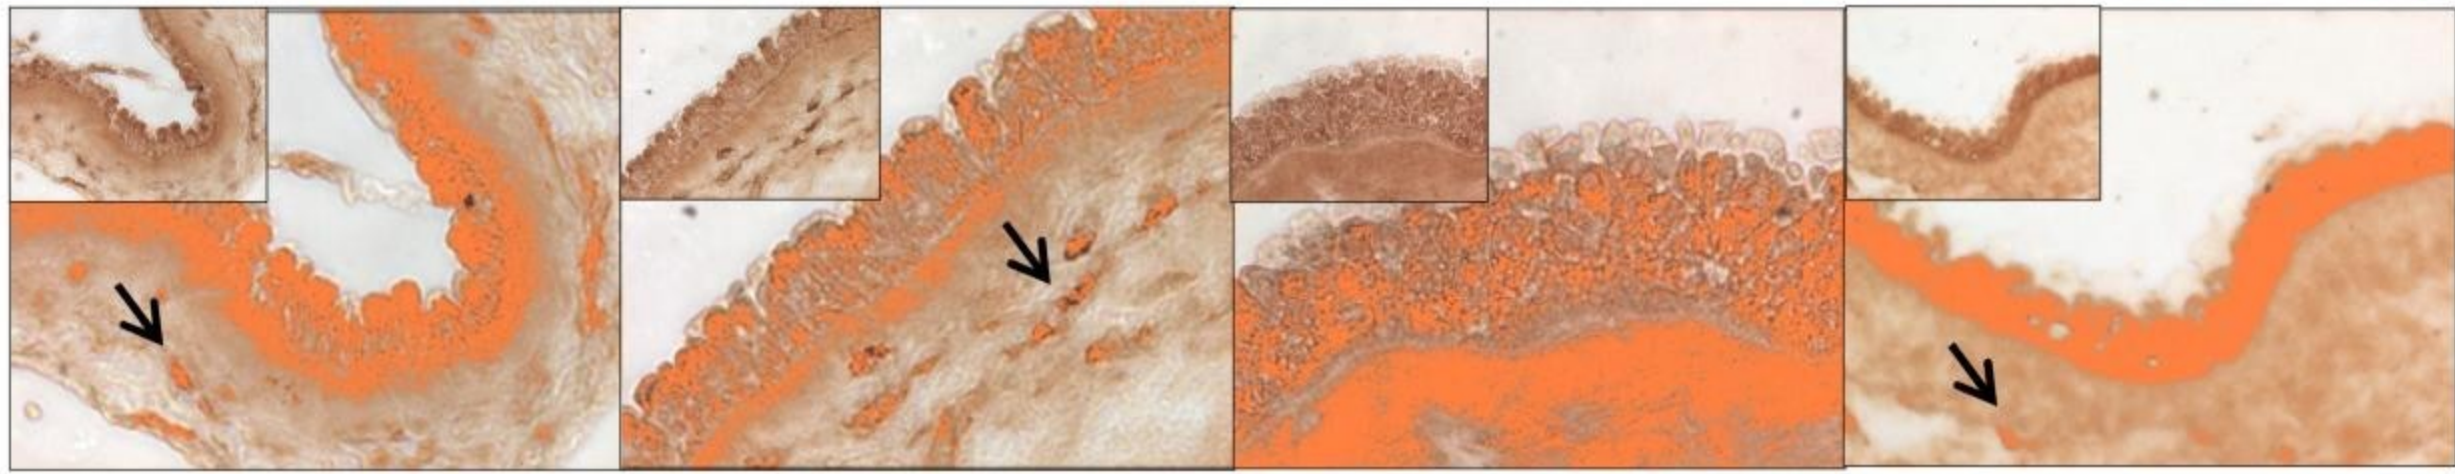 **$\alpha$ -Fetoprotein**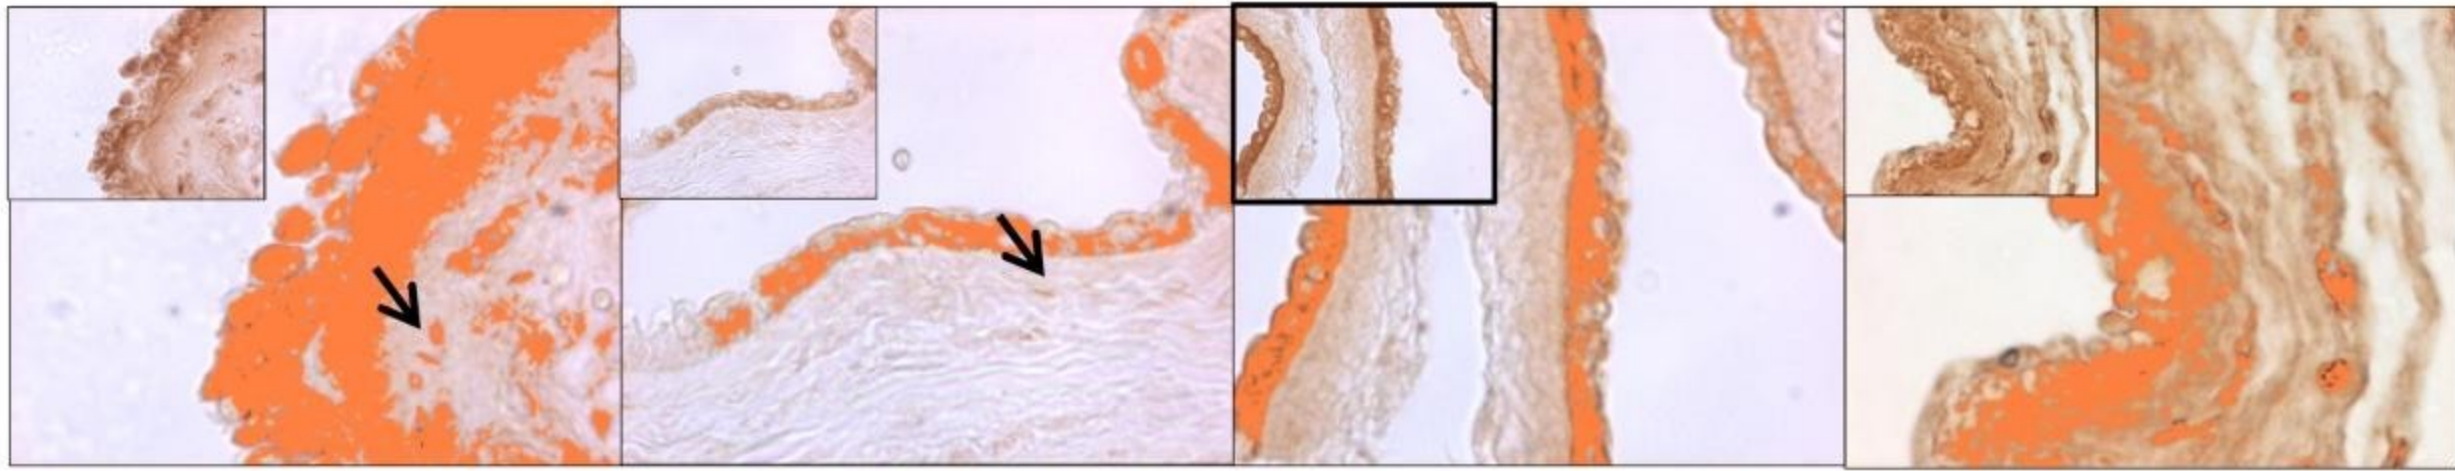**CREB**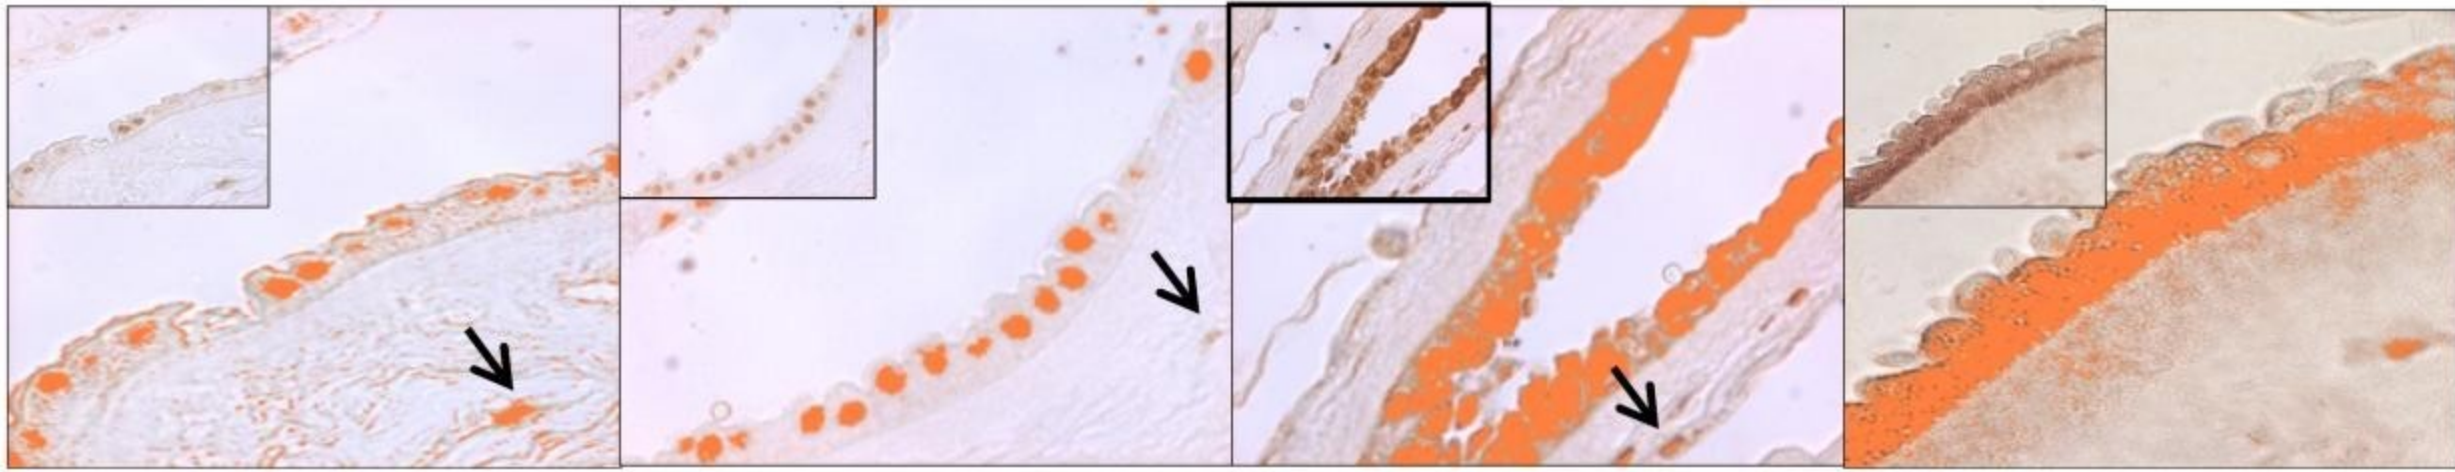**p-CREB**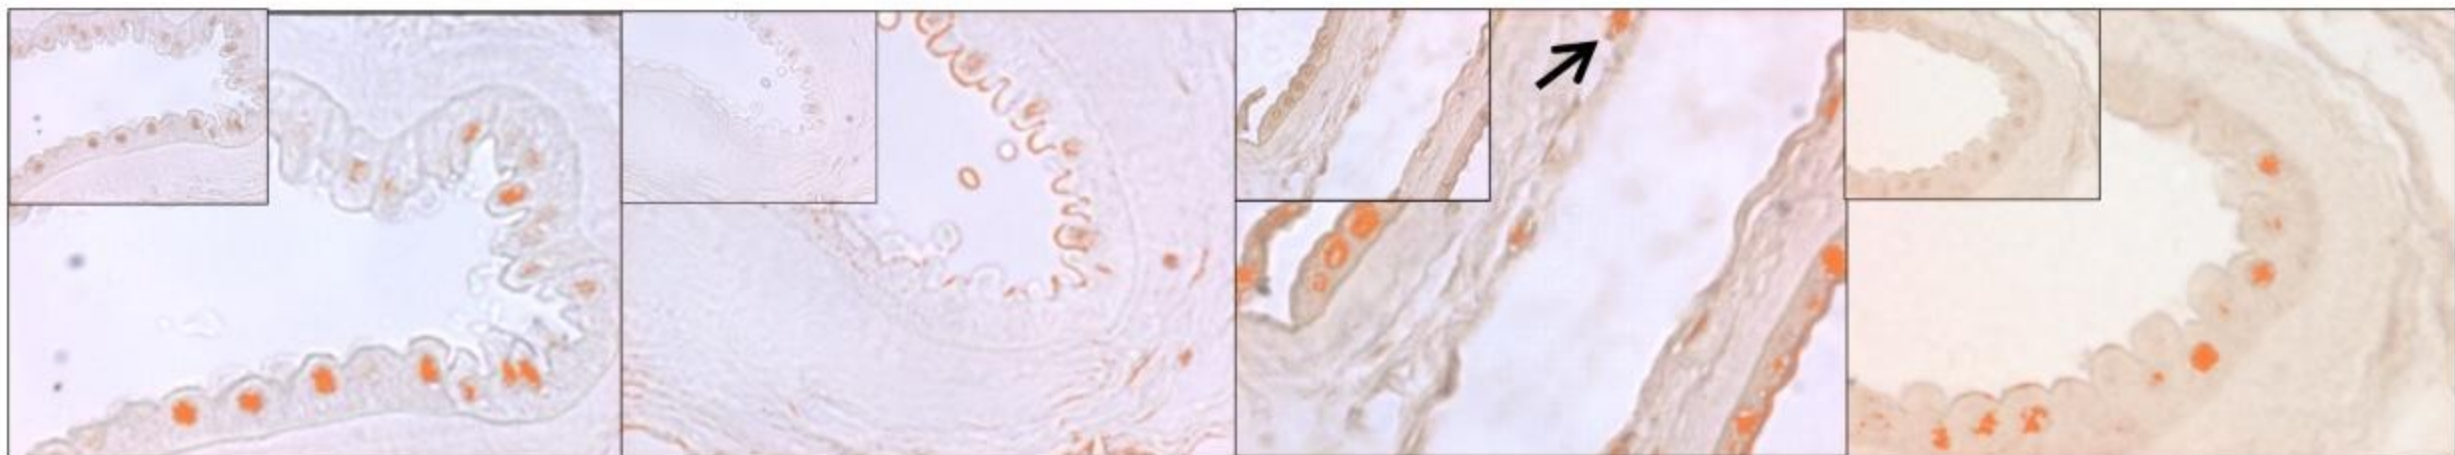

Central

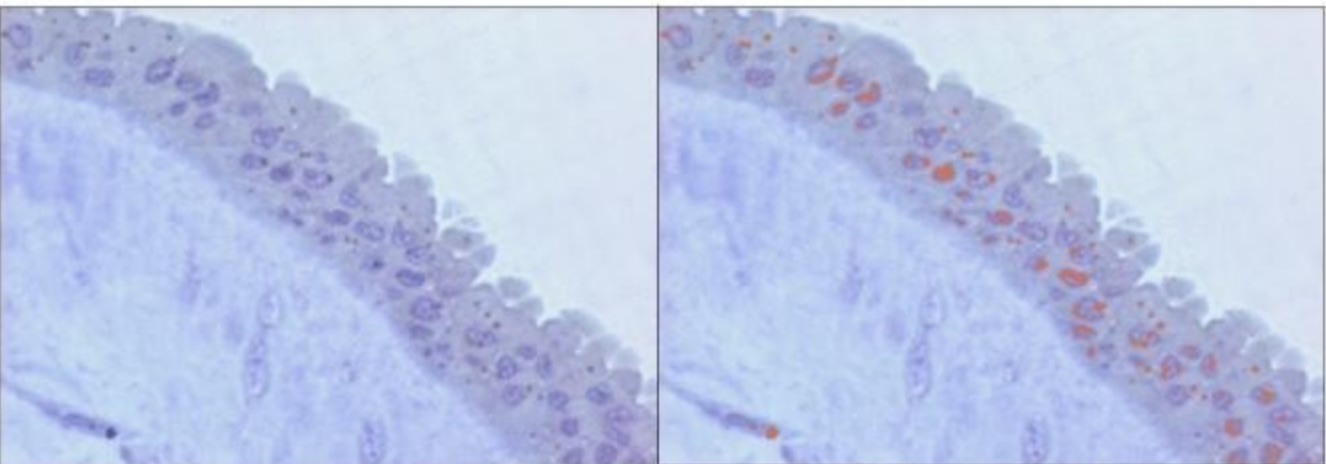

Intermediate

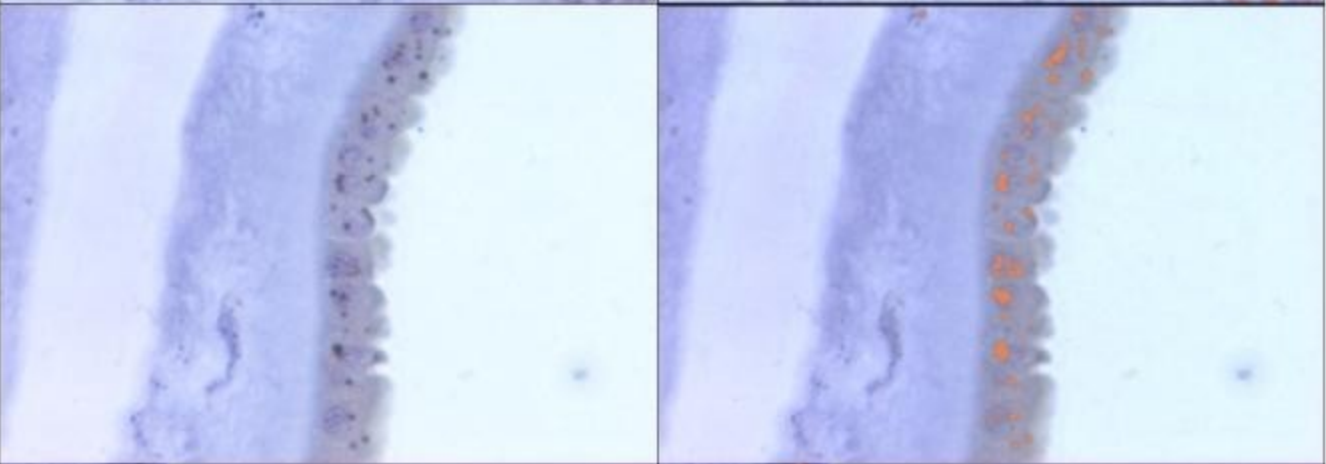

Peripheral

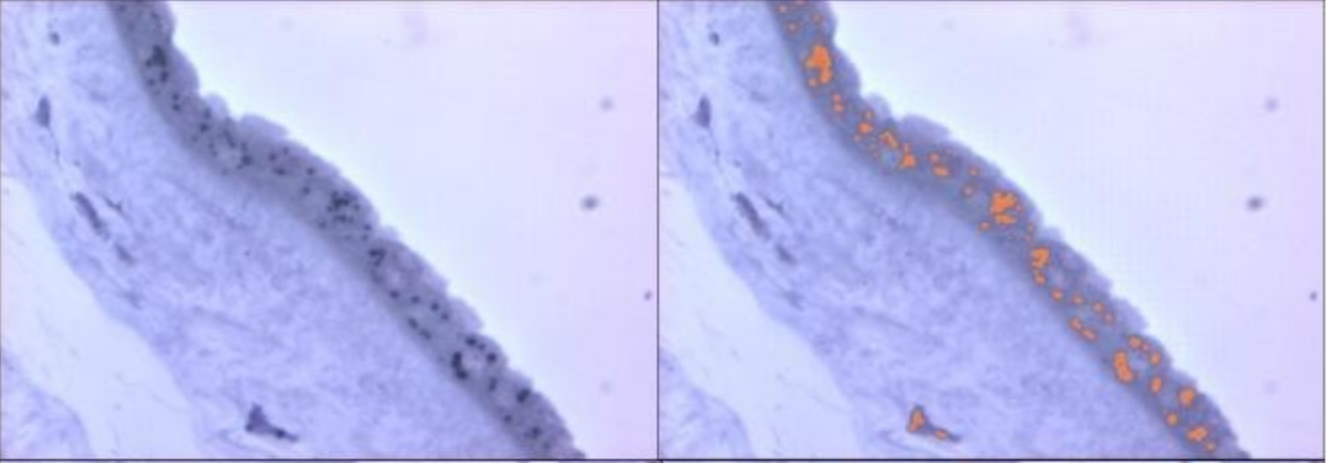

Reflected

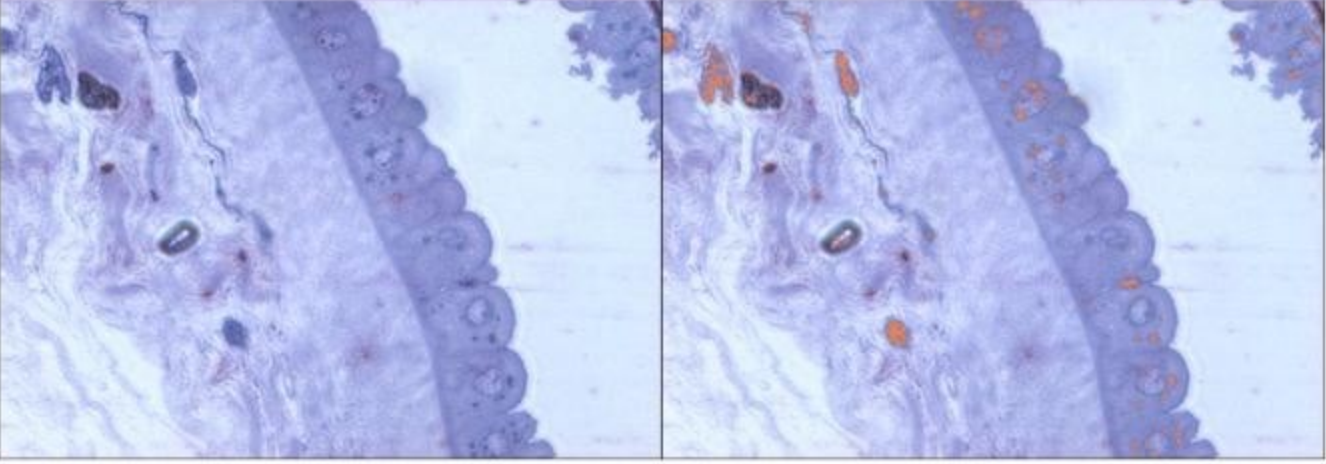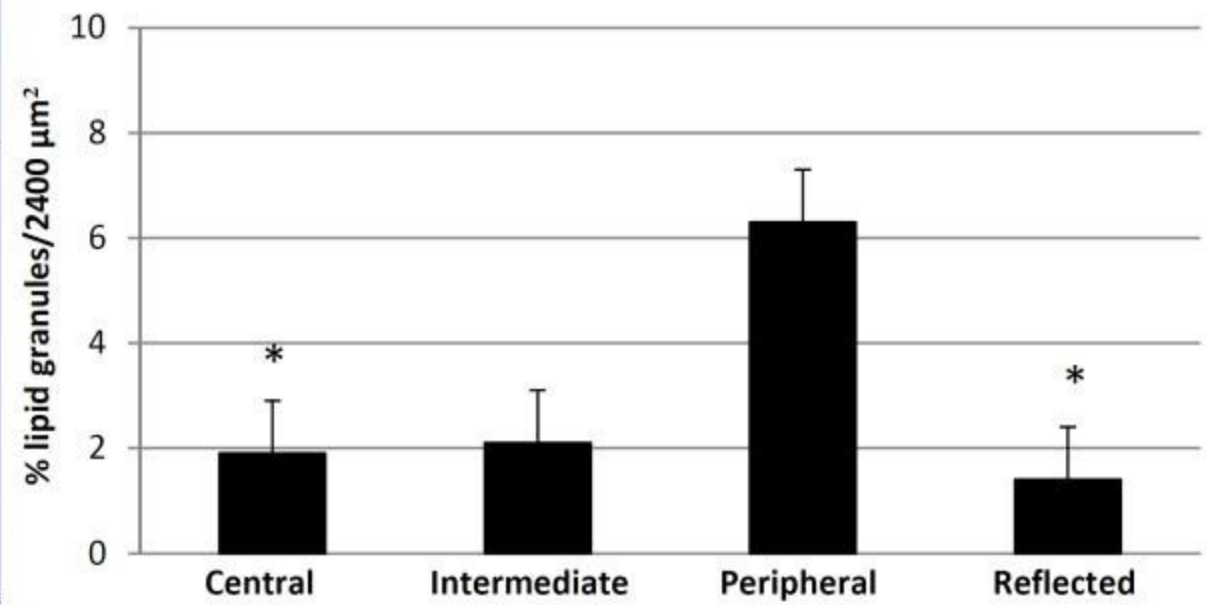

Supplement: 725078_supp.pdf [file 725078_supp.pdf]
